# Supplementary material for: Removal of Heavy Metals from Acid Mine Drainage by Red Mud–Based Geopolymer Pervious Concrete: Batch and Long–Term Column Studies
Source: MDPI journal article supplement (doi:10.3390/polym14245355), 2022-12-07
Supplement: s1 [file s1]

## Supplementary data

### 1. Tables

**Table S1.** Characteristics of simulated acid mine drainage.

| pH | Cu(mg/L) | Mn(mg/L) | Cd(mg/L) | Zn(mg/L) |
|----|----------|----------|----------|----------|
| 4  | 10.0     | 10.0     | 1.6      | 16.0     |

**Table S2.** Characteristics of real acid mine drainage from Qibao Shan.

| pH  | Cd(mg/L) | Cu(mg/L) | Mn(mg/L) | Pb(mg/L) | Zn(mg/L) |
|-----|----------|----------|----------|----------|----------|
| 4.8 | 1.0      | 35.2     | 3.1      | 0.3      | 3.2      |

**Table S3.** Characteristics of effluent at different times. <LD indicates that value is below the detection limit.

| Days | Cd  | Cu   | Mn   | Pb  | Zn  |
|------|-----|------|------|-----|-----|
| 1    | <LD | 0.01 | 0.01 | <LD | <LD |
| 5    | <LD | 0.03 | 0.01 | <LD | <LD |
| 10   | <LD | 0.02 | 0.02 | <LD | <LD |
| 15   | <LD | 0.02 | 0.03 | <LD | <LD |

### 3. Figures

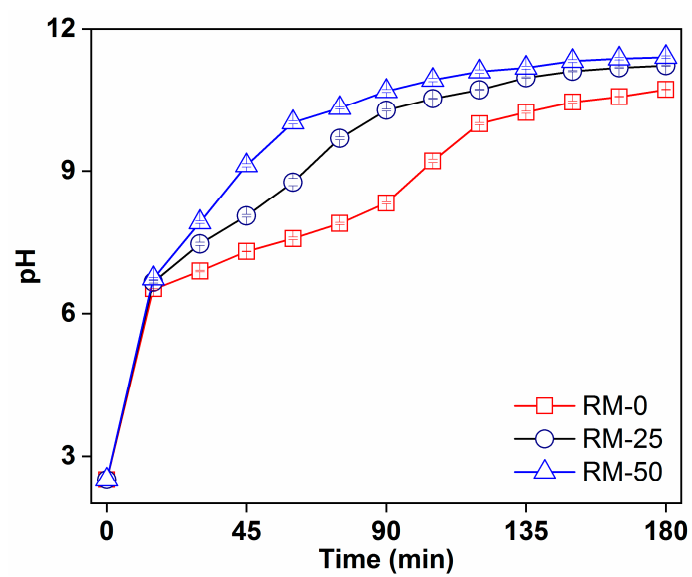

Figure S1. Variation of pH value in heavy metals removal experiment.

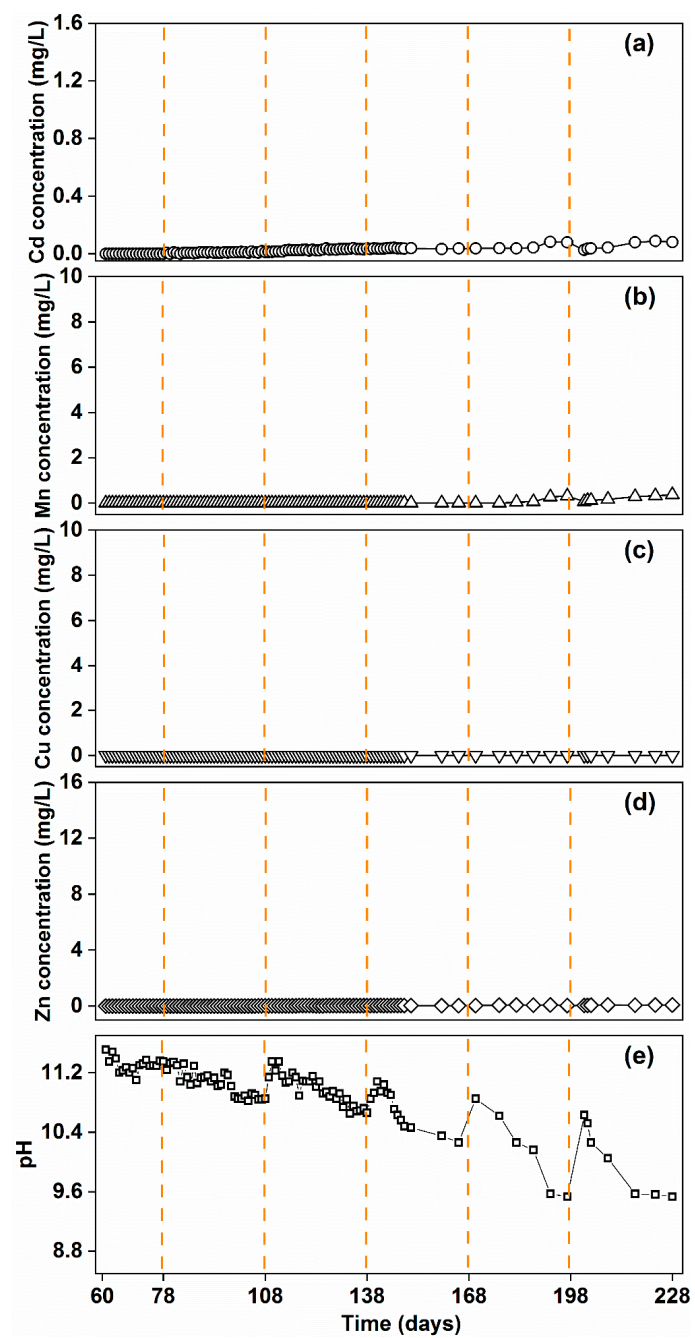

**Figure S2.** Changes in (a) Cd , (b) Mn, (c) Cu and (d) Zn concentrations, and (e) pH with time during long-term operation.

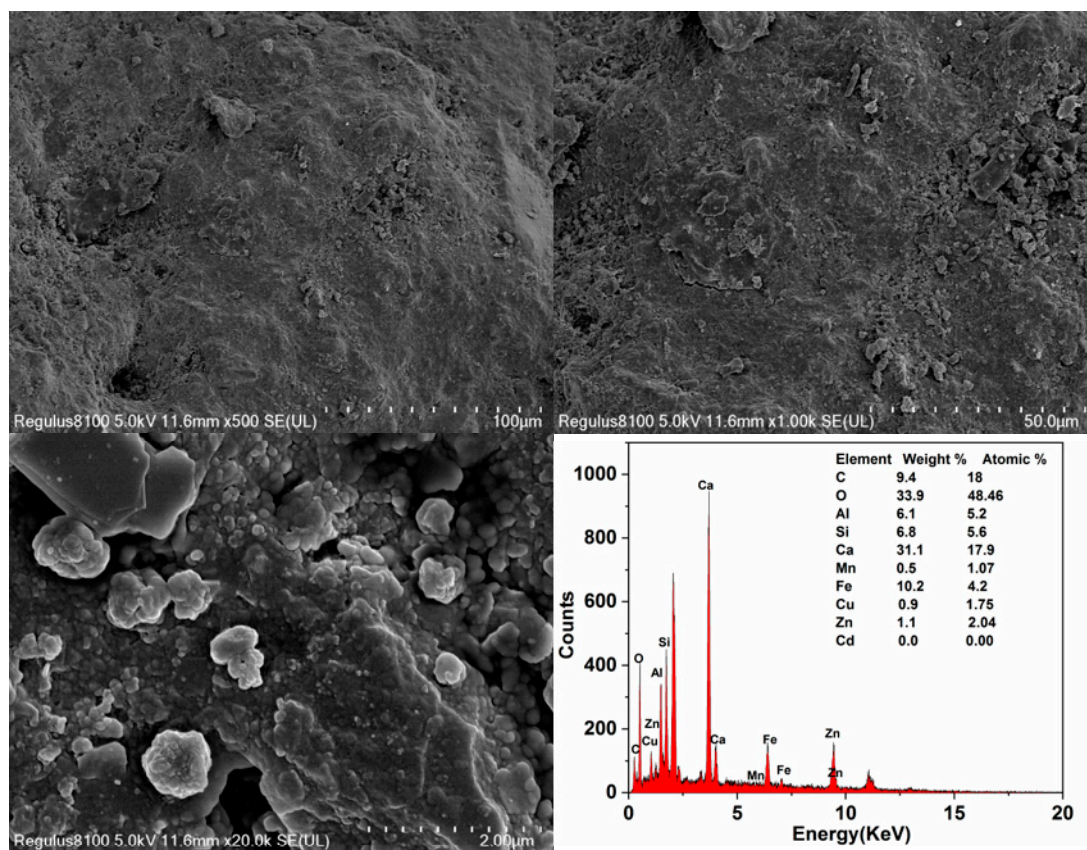

**Figure S3.** SEM photo of raw RMPC before reaction.
